# Supplementary material for: A photocrosslinkable and anti-inflammatory hydrogel of loxoprofen-conjugated chitosan methacrylate
Source: Royal Society of Chemistry journal article supplement (doi:10.1039/d4tb01956c), 2024-01-01
Supplement: d4tb01956c1.pdf [file d4tb01956c1.pdf]

### Supplementary information

Table S1. Primer sequences for PCR.

| Gene names                    | Sequences                                                                        |
|-------------------------------|----------------------------------------------------------------------------------|
| <i>Il6</i>                    | Forward 5'- CTGCAAGAGACTTCCATCCAG -3'<br>Reverse 5'- AGTGGTATAGACAGGTCTGTTGG -3' |
| <i>TNF<math>\alpha</math></i> | Forward 5'- CAGGCGGTGCCTATGTCTC -3'<br>Reverse 5'- CGATCACCCCGAAGTTCAGTAG -3'    |
| <i>Il4</i>                    | Forward 5'- TCTCACCTCCCAACTGCTTC -3'<br>Reverse 5'- ACTTTGCCGAGCTGTCCTTGGAGA -3' |

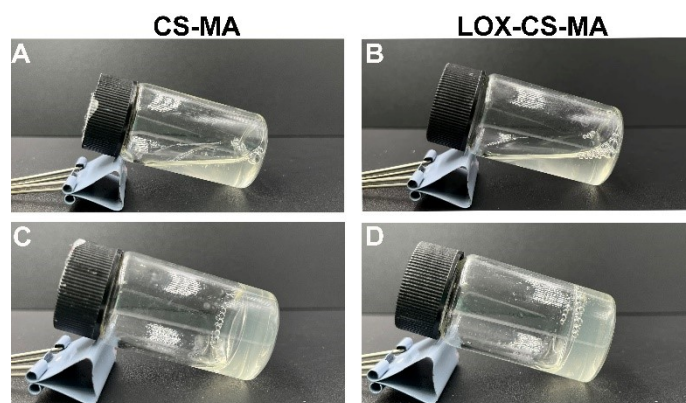

Figure S1. Photographs of CS-MA (A) and LOX-CS-MA (B) pre-gel solutions, and after visible light (405 nm) crosslinking to form CS-MA (C) and LOX-CS-MA (D) hydrogels.

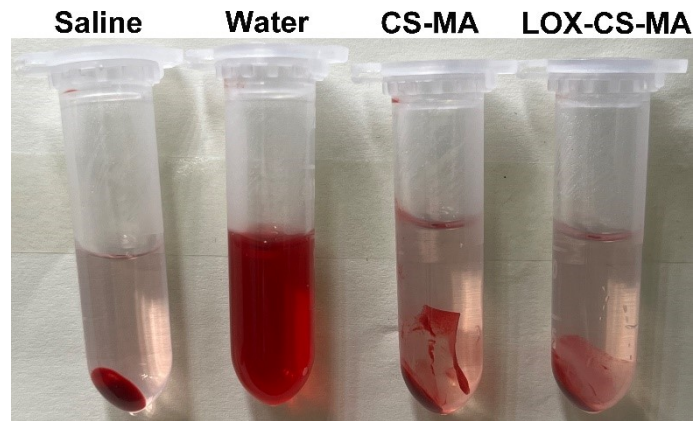

Figure S2. Photographs of the hemolysis assay for hydrogels blood compatibility testing.
